# Supplementary material
Source: PubMed Central journal article supplement (PMC4359966)
Supplement: NIHMS658086-supplement-1.pdf [file NIHMS658086-supplement-1.pdf]

# Supplemental Information

## Supplementary Figures

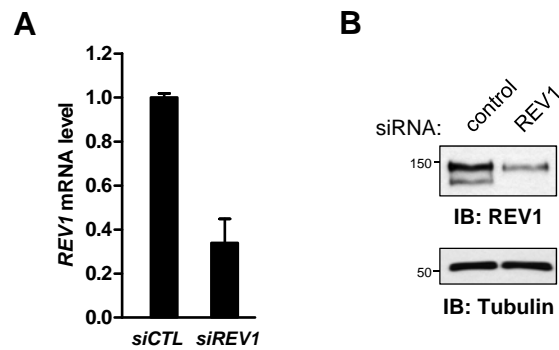

**Figure S1. Confirmation of siRNA-mediated depletion of endogenous REV1.** MCF7 cells were transfected with non-targeting control or *REV1* siRNAs. 48 h following siRNA transfection, cell extracts were prepared and analyzed by qRT-PCR (A) and Western blot (B).

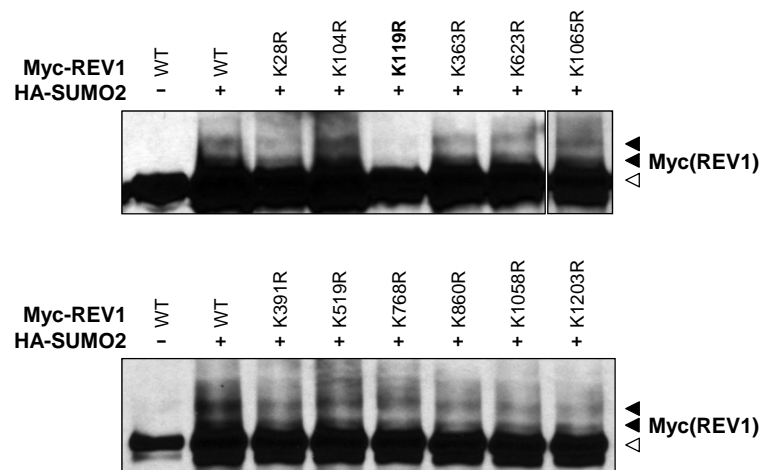

**Figure S2. Mouse REV1 protein is SUMO2-modified at the K119 residue *in vivo*.** HEK293 cells were co-transfected with wild-type or mutated Myc-REV1 and HA-SUMO2, and cell extracts were immunoblotted with anti-Myc antibody. Arrowheads indicate the SUMOylated form (filled) and the unmodified form (open).

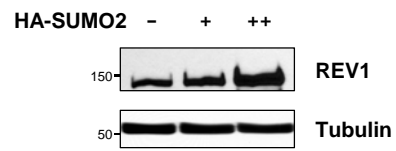

**Figure S3. SUMOylation increases the stability of endogenous REV1.** B16 cells were transfected with different amounts of HA-SUMO2 expressing vectors for 18 h, lysed and immunoblotted with anti-REV1 antibody. A tubulin blot was presented as a loading control.

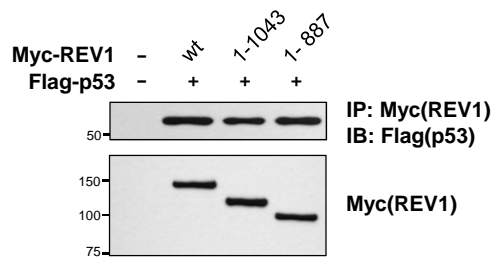

**Figure S4. Pull-down assays of the interaction between p53 and deletion mutants of REV1.** Myc-tagged full-length or deletion mutants (residues 1-1043 and 1-887) of REV1 were co-transfected with Flag-tagged full-length p53 in HEK293 cells. 24 h after transfection, cell lysates were immunoprecipitated with anti-Myc-agarose beads. The immune complexes were subjected to immunoblot with the indicated antibodies.

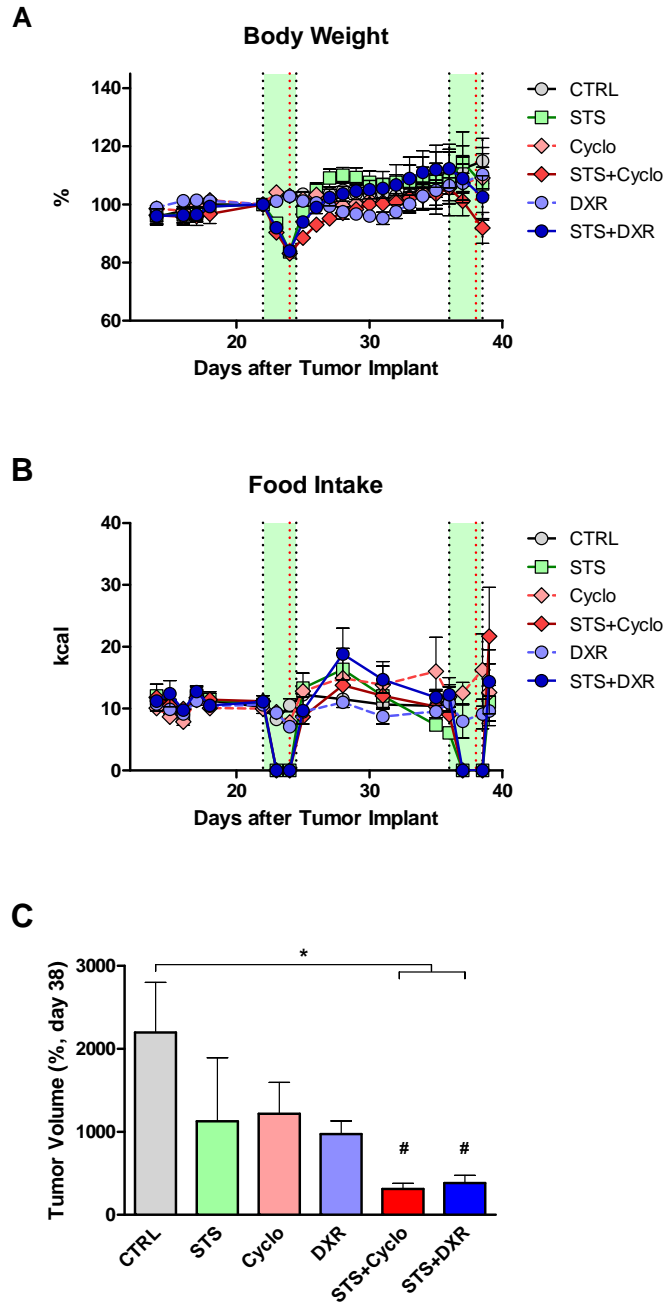

**Figure S5. Effect of fasting and chemotreatment on body weight, food intake, and tumor volume in allografted mouse model.** (A, B) Effect of fasting on body weight (A) and food intake values (B). Body weight and food intake of tumor-bearing mice were determined periodically, and points and bars represent the mean  $\pm$  S.E.M ( $n = 5$ ). (C) Tumor volumes on day 38 were measured. Data shown are the mean  $\pm$  S.E.M. \*,  $P < 0.05$ , ANOVA with Tukey's multiple comparison test; #,  $P < 0.05$ ,  $t$  test, two tailed, compared to chemotreatment alone.

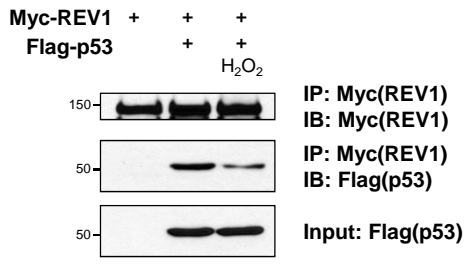

**Figure S6. H<sub>2</sub>O<sub>2</sub> treatment disrupts REV1-p53 interaction.** The cells co-transfected with Flag-p53 and Myc-REV1 expression vectors were treated with H<sub>2</sub>O<sub>2</sub> (200 μM) for 30 min. The whole cell lysates were subjected to Co-IP assay.

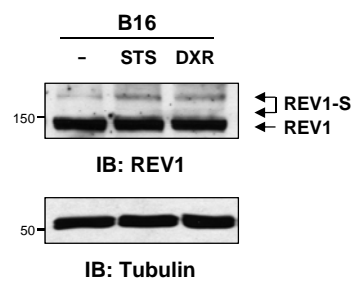

**Figure S7. REV1 SUMOylation upon starvation and chemotreatment.** B16 cells were incubated with starvation medium or treated with doxorubicin (1  $\mu$ M) for 24 h, lysed and immunoblotted with anti-REV1 antibody. A tubulin blot was presented as a loading control.

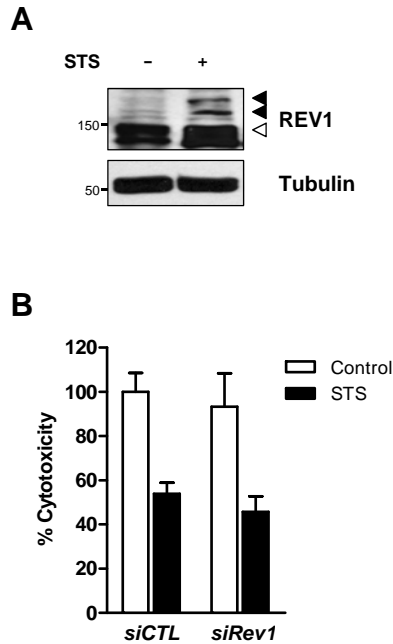

**Figure S8. The effect of REV1 SUMOylation on normal cells.** (A) Primary MEFs were treated with starvation medium for 24 h, lysed and immunoblotted with anti-REV1 antibody. A tubulin blot was presented as a loading control. (B) The cytotoxicity of primary MEFs after exposure to DXR treatments. Primary MEFs were transfected with *siCTL* or *siRev1*. 24 h following siRNA transfection, cells were incubated in normal or starvation conditions for additional 24 h. Cytotoxicity were analyzed 24 h treatment of 10  $\mu$ M DXR. Data was plotted as the percentage of *siCTL*-transfected cells treated with DXR. Results represent mean  $\pm$ SD from three independent experiments.



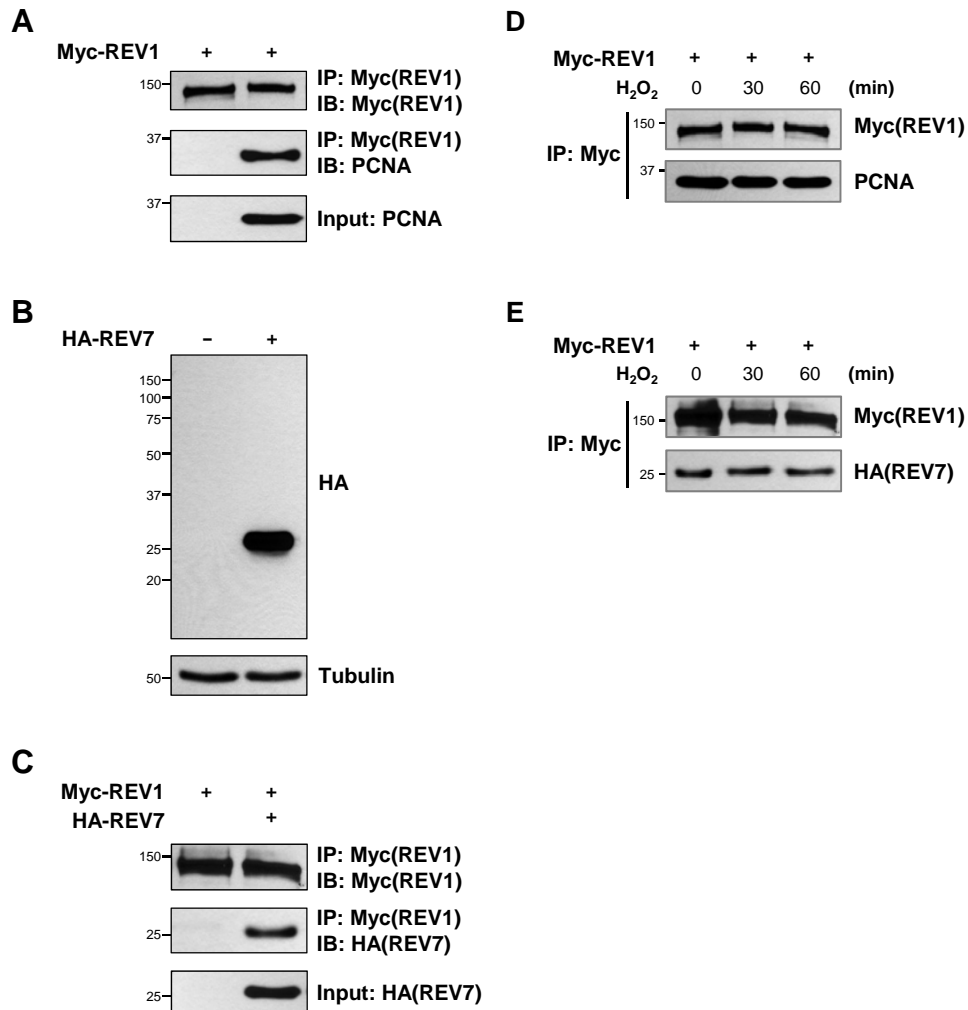

**Figure S9. REV1 associates with PCNA and REV7, an accessory subunit of Pol $\zeta$ .** (A) Myc-REV1 was transiently expressed in HEK293 cells, and cell lysates were immunoprecipitated with anti-Myc antibody, and the immune complex were analyzed by immunoblotting with anti-Myc and anti-PCNA antibodies. Whole cell lysates were immunoblotted for PCNA as input control. (B) Mouse REV7 tagged with HA epitope was expressed in HEK293 cells and immunoblot analysis using anti-HA antibody confirmed the expression of HA-REV7 construct. (C) Cells were co-transfected with Myc-REV1 and HA-REV7, and cell lysates were immunoprecipitated with anti-Myc antibody, followed by Western blot with anti-Myc and anti-HA antibodies. (D, E) Cells transiently transfected with Myc-REV1 and/or HA-REV7 were treated with H<sub>2</sub>O<sub>2</sub> (200  $\mu$ M) for the indicated time and immunoprecipitated with anti-Myc antibody. The immune complex were analyzed by immunoblotting with anti-Myc, anti-PCNA, and anti-HA antibodies.
